# Supplementary material for: Designing All Graphdiyne Materials as Graphene Derivatives: Topologically Driven Modulation of Electronic Properties
Source: PubMed Central journal article supplement (PMC8404194; doi:10.1021/acs.jpcc.1c04238), 2021-07-15
Supplement: jp1c04238_si_002.pdf [file jp1c04238_si_002.pdf]

# Supporting Informations

## Designing all graphdiyne materials as graphene derivatives: topologically driven modulation of electronic properties

Patrick Serafini<sup>1</sup>, Alberto Milani<sup>1\*</sup>, Davide M. Proserpio<sup>2,3</sup>, Carlo S. Casari<sup>1\*</sup>

<sup>1</sup>Dipartimento di Energia, Politecnico di Milano, via Ponzio 34/3, Milano, Italy

<sup>2</sup>Dipartimento di Chimica, Università degli Studi di Milano, 20133 Milano, Italy

<sup>3</sup>Samara Center for Theoretical Materials Science (SCTMS), Samara State Technical University, Samara 443100, Russia

\*Corresponding authors: alberto.milani@polimi.it; carlo.casari@polimi.it

**Table S1:** Computed band structures and density of states (DOS), with a sketch of the structure for each of the analysed 2D crystal, are reported. For some specific cases, a comparison between band structures and DOS calculated with PBE0 and HSE06 exchange-correlation density functionals is reported.

| Names                  | Band Structure + DOS (PBE0)                                            | Band Structure + DOS (HSE06) |
|------------------------|------------------------------------------------------------------------|------------------------------|
| <p><b>Graphene</b></p> | <p style="text-align: center;">BANDS AND DENSITY OF STATES DIAGRAM</p> |                              |

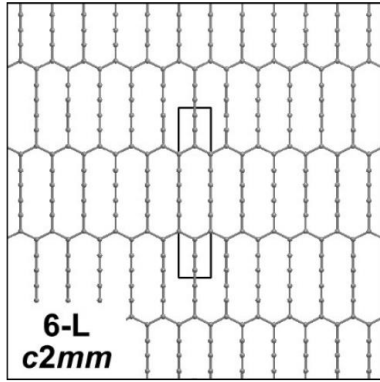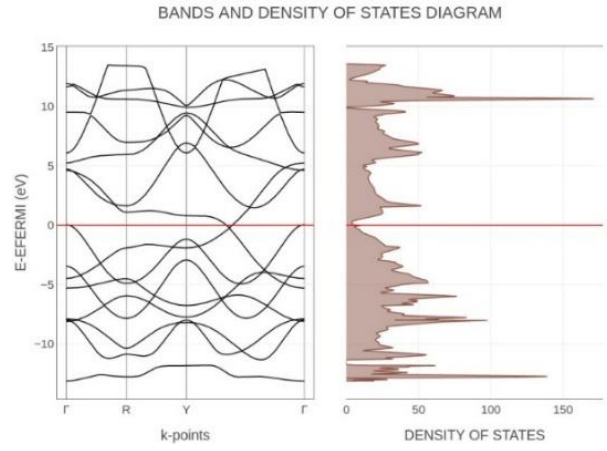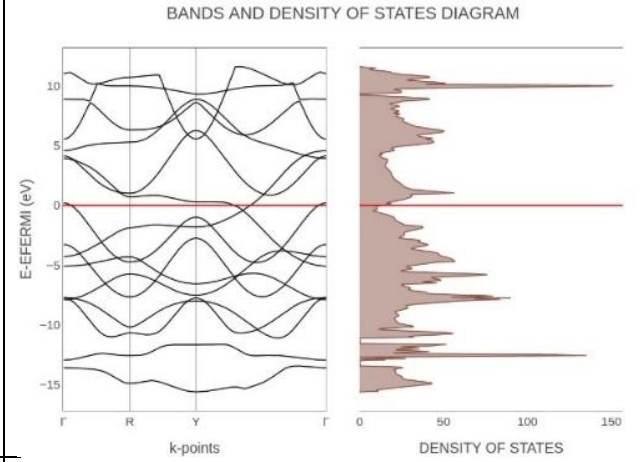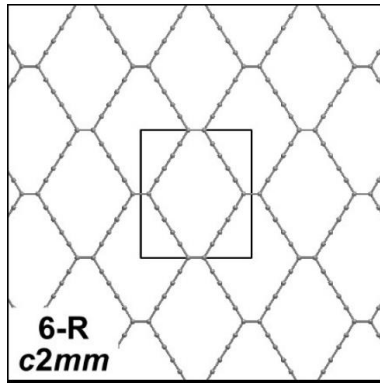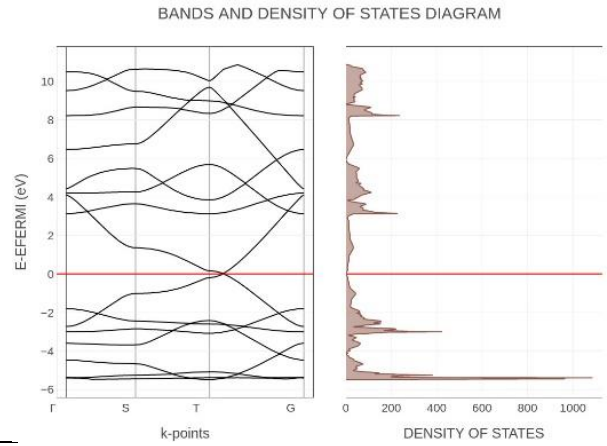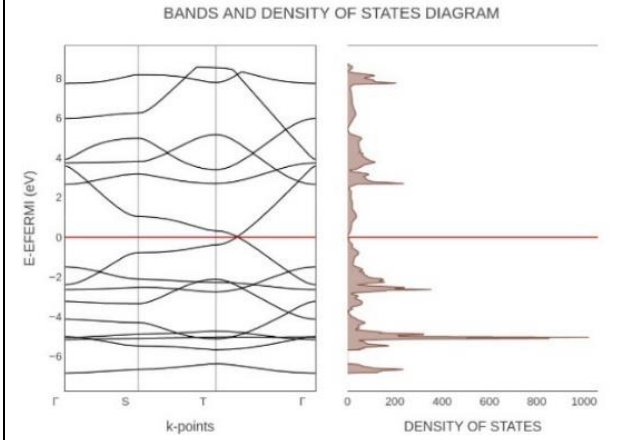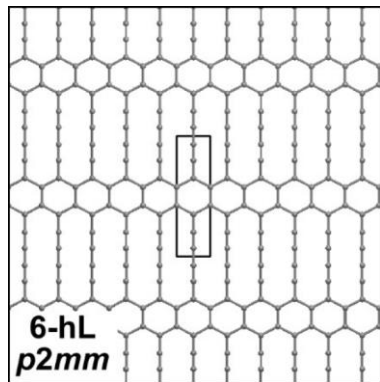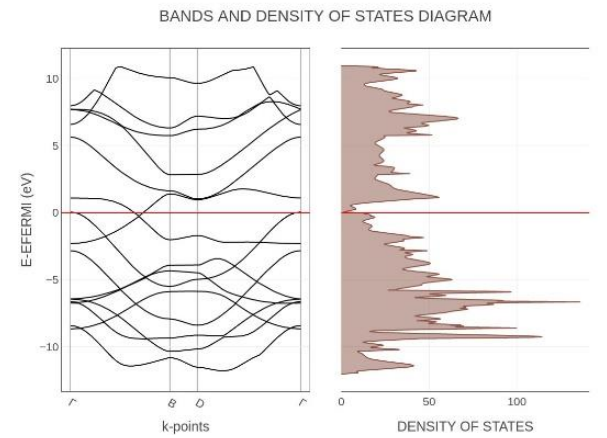

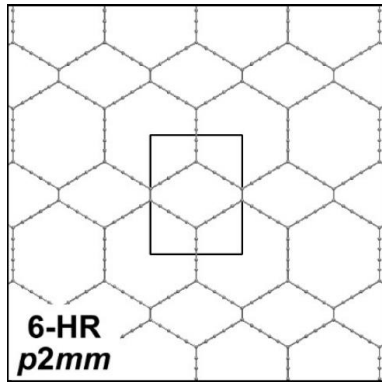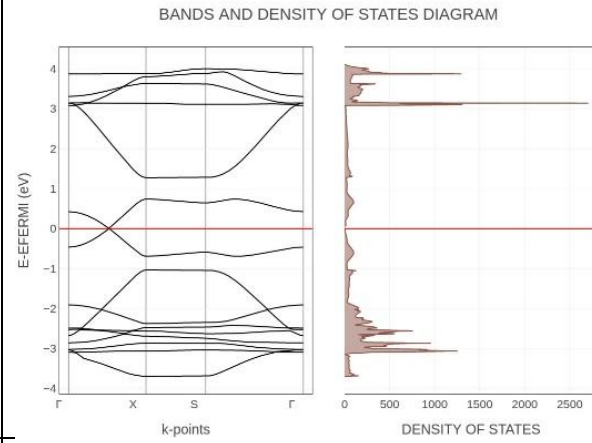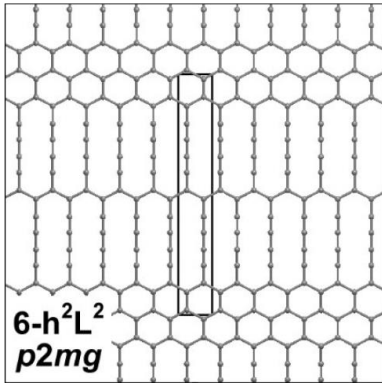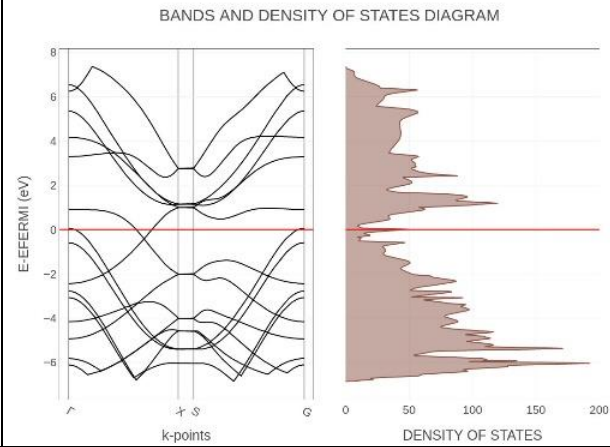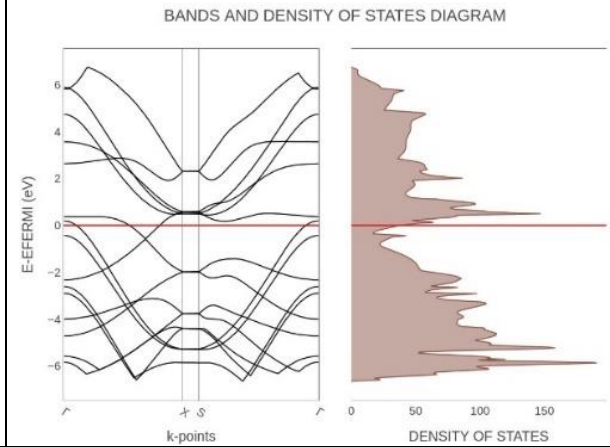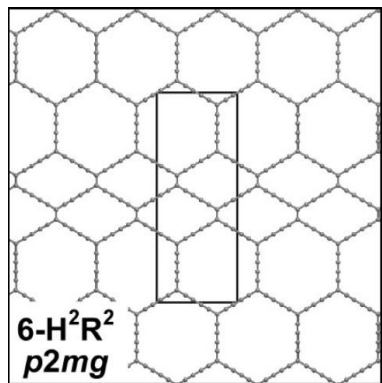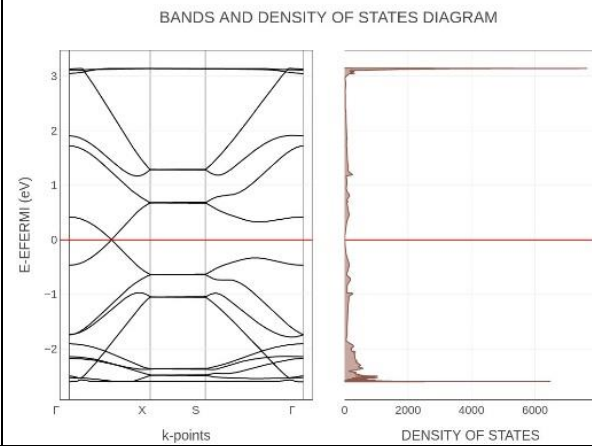

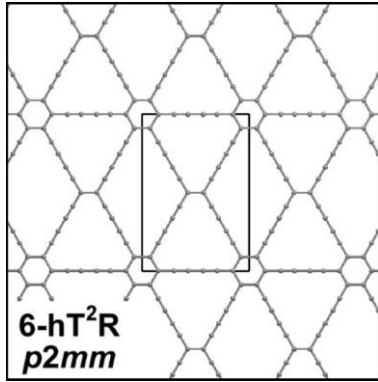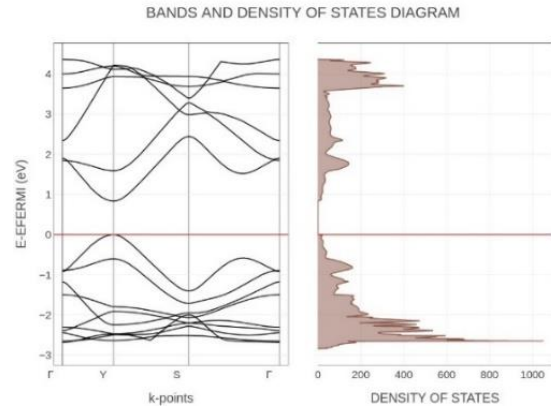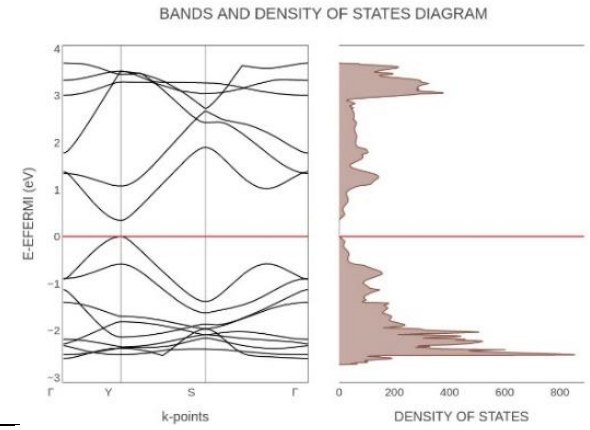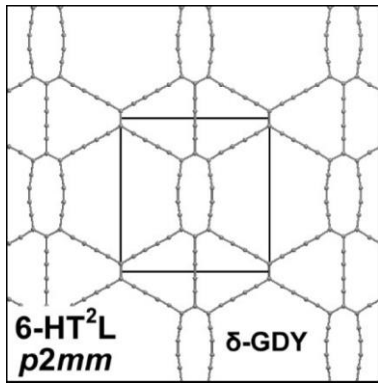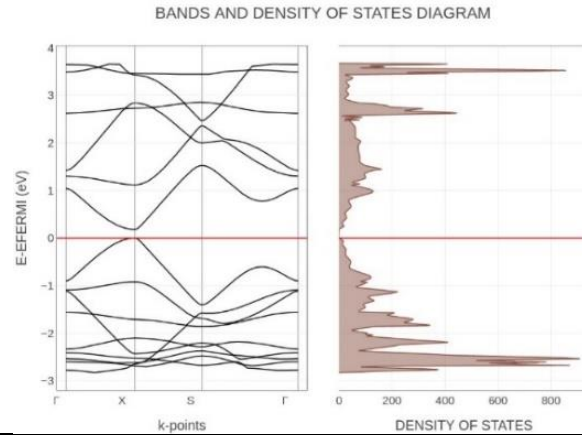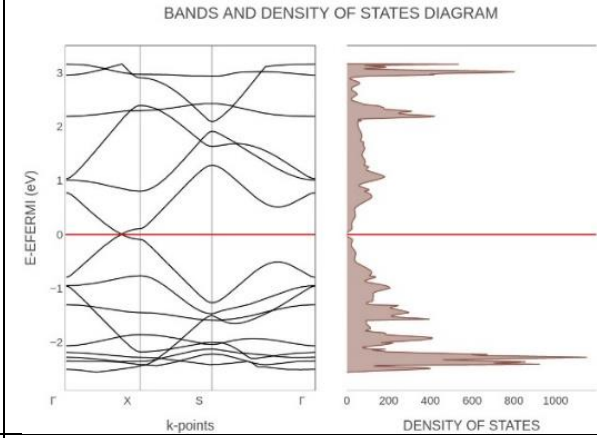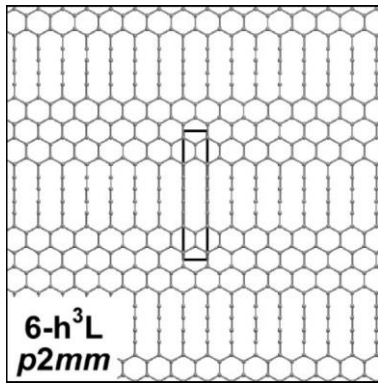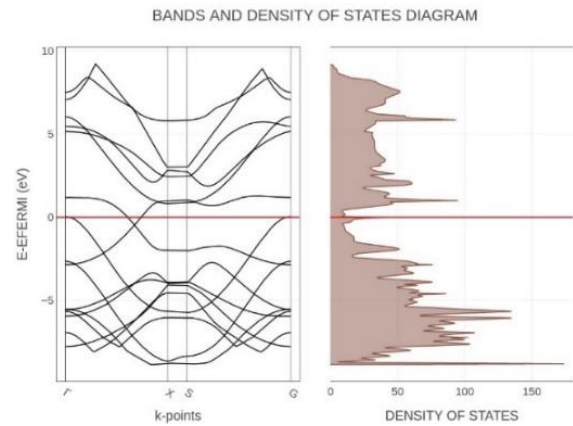



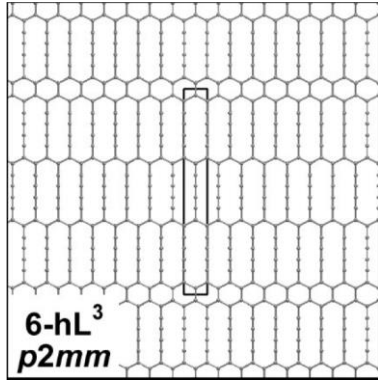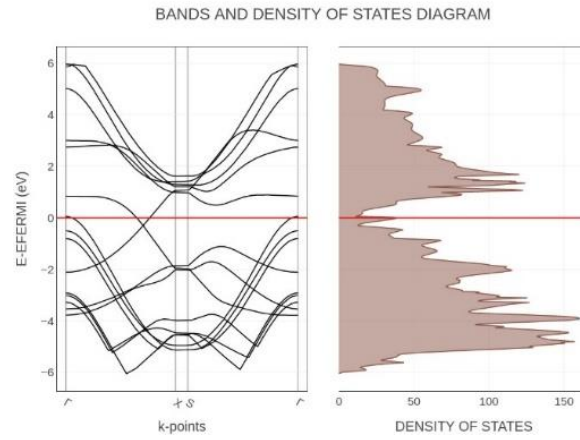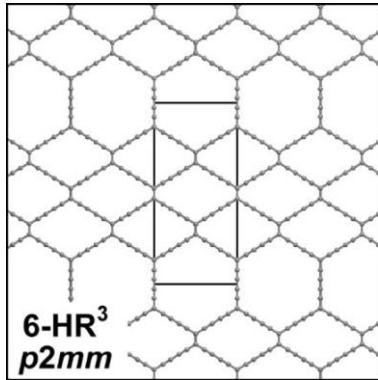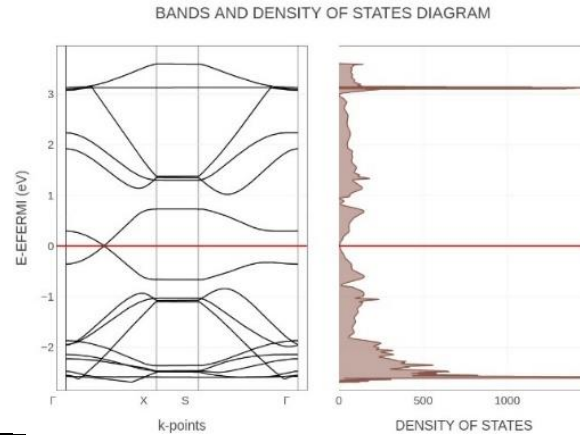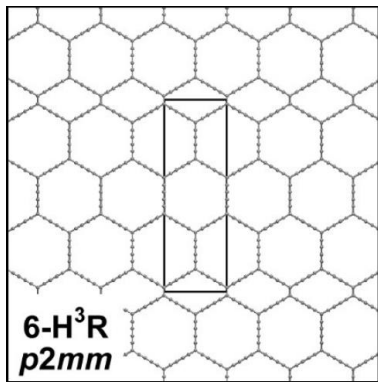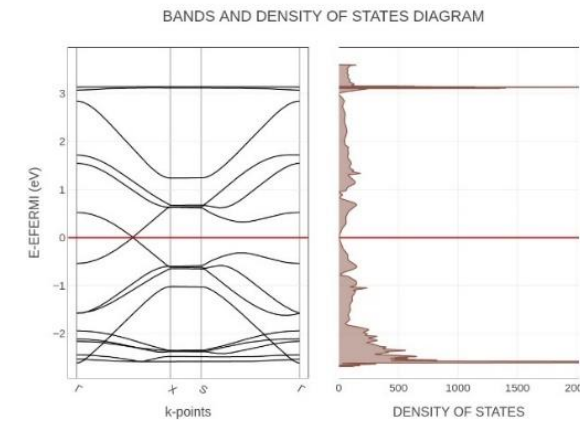

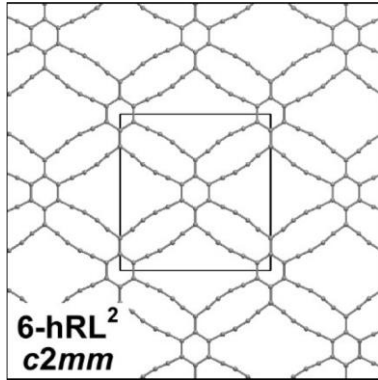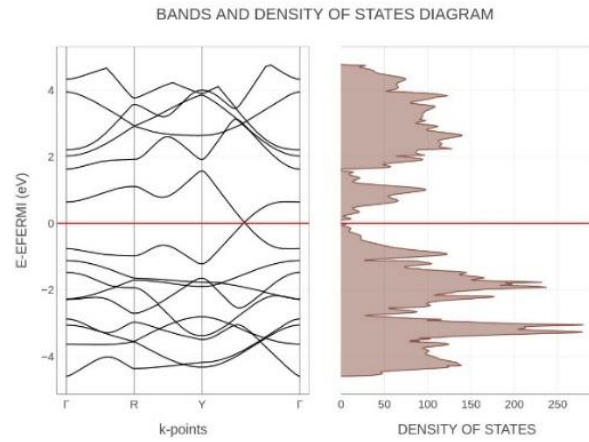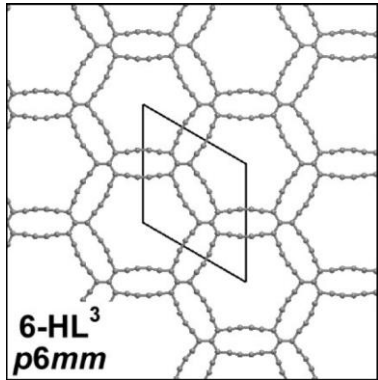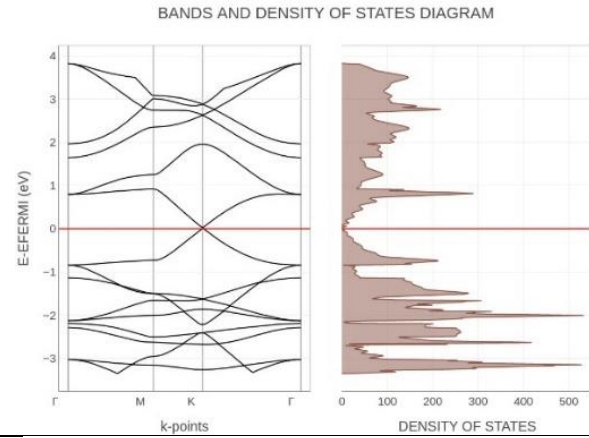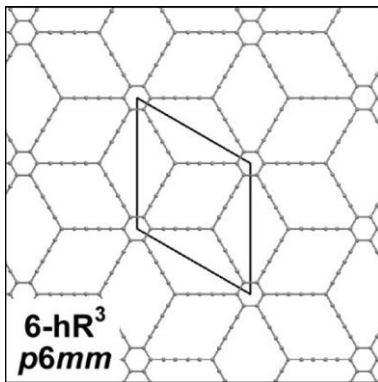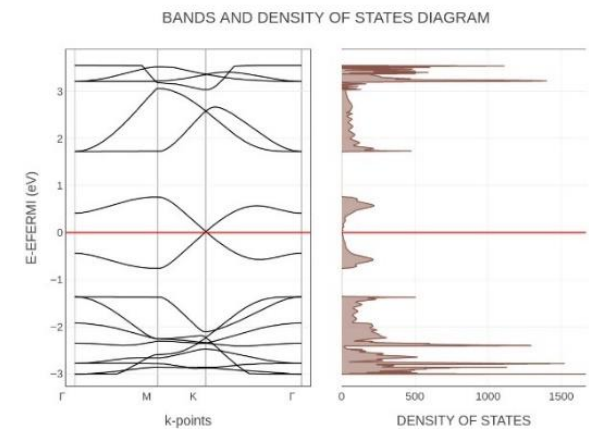

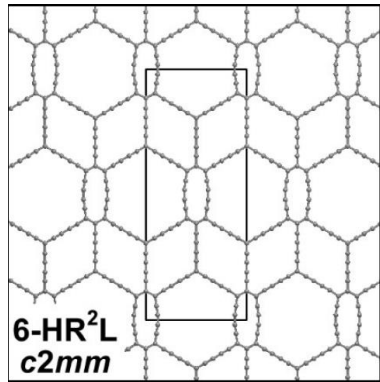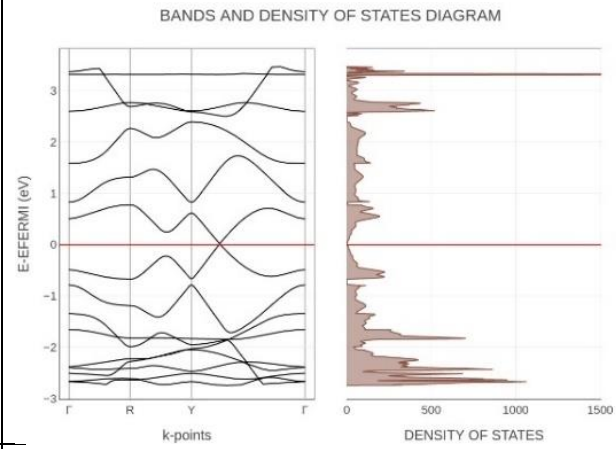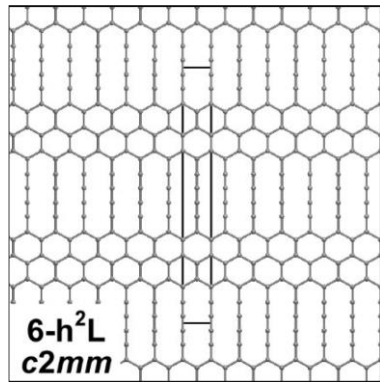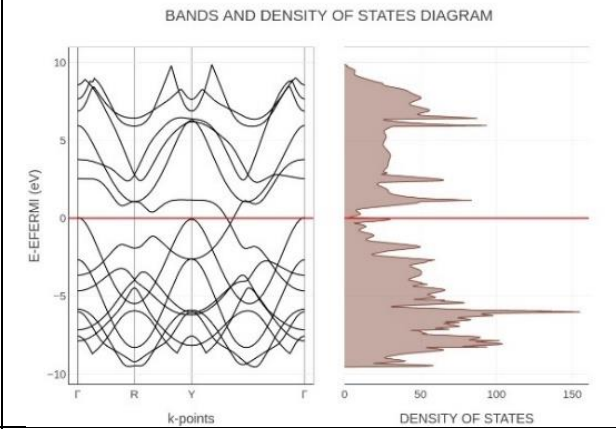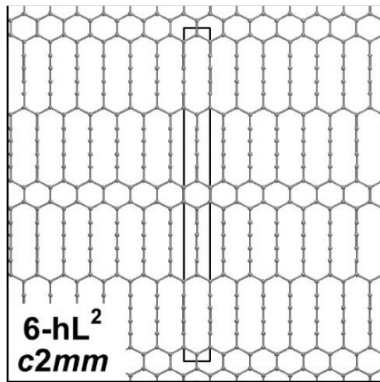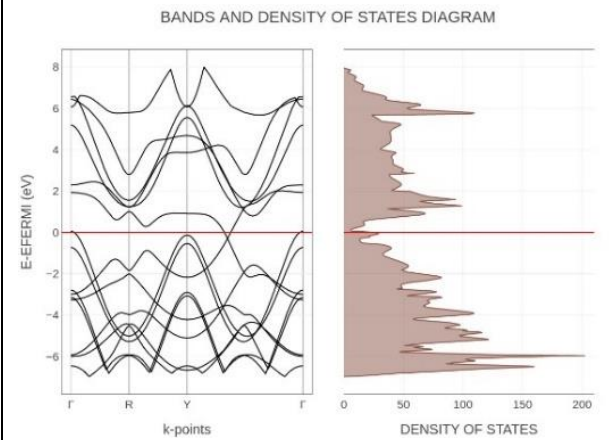

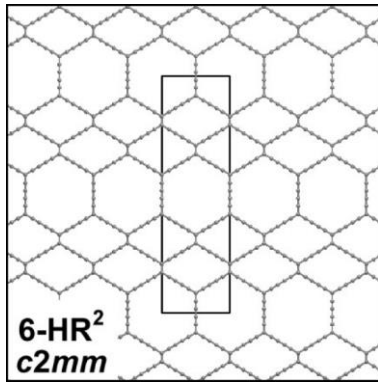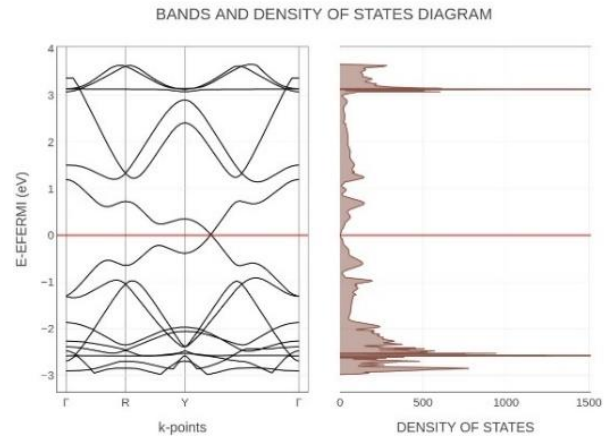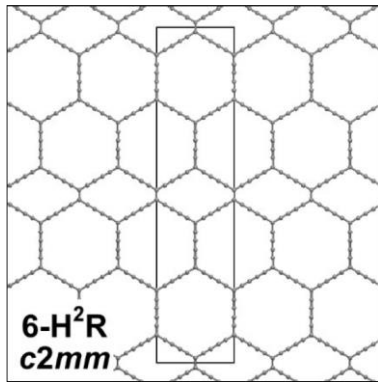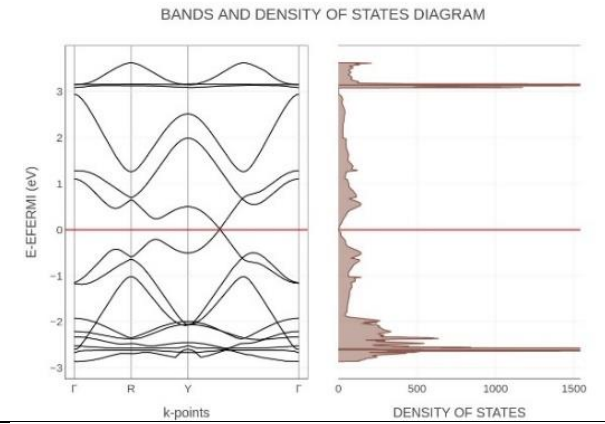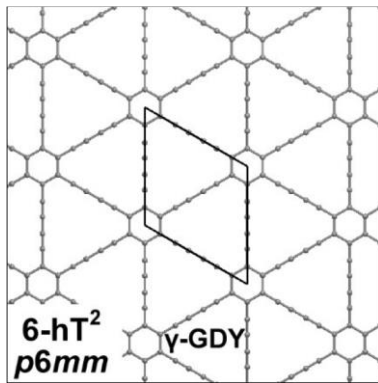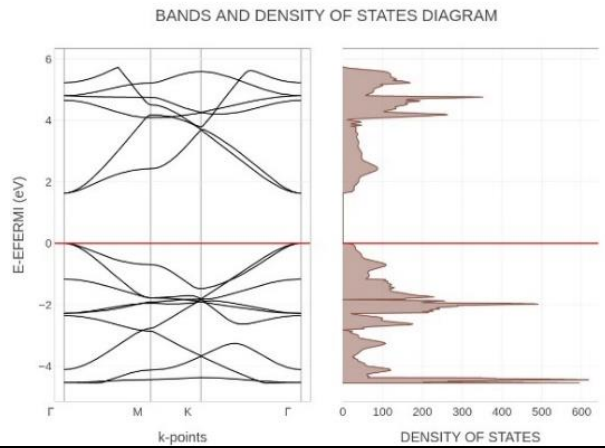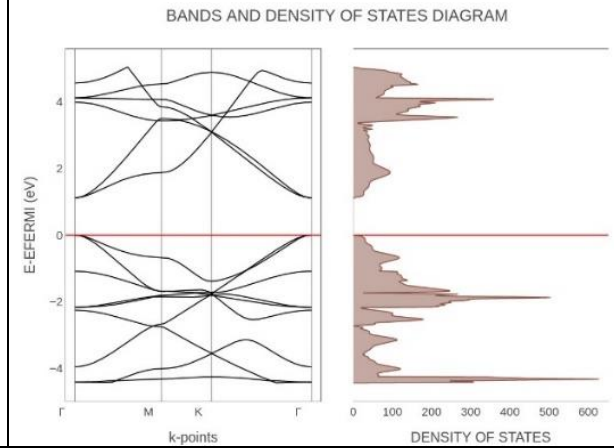



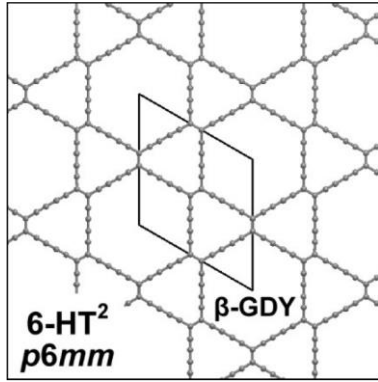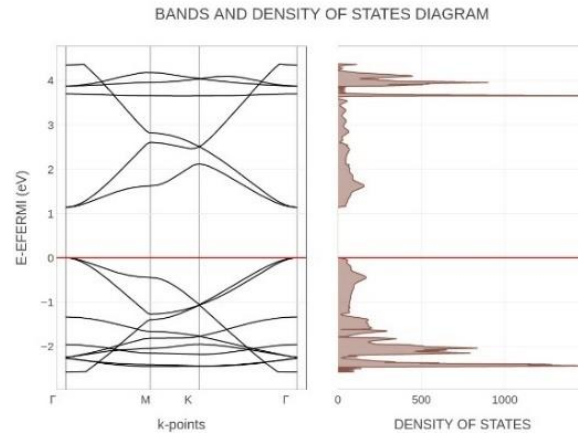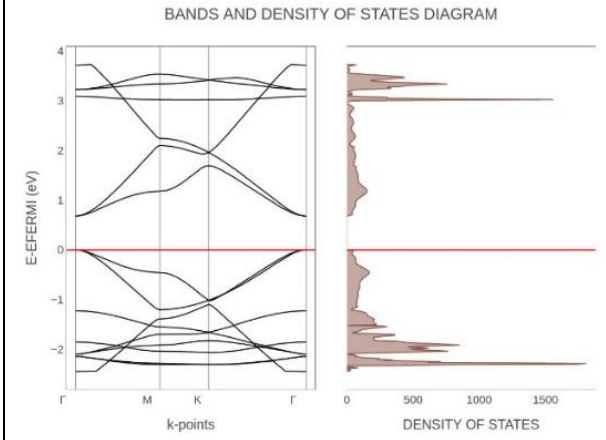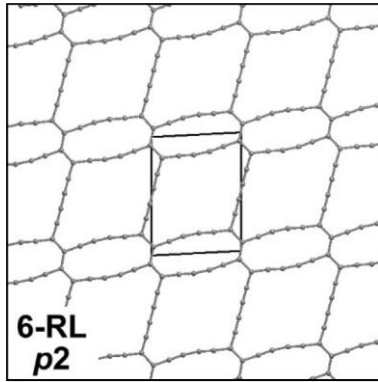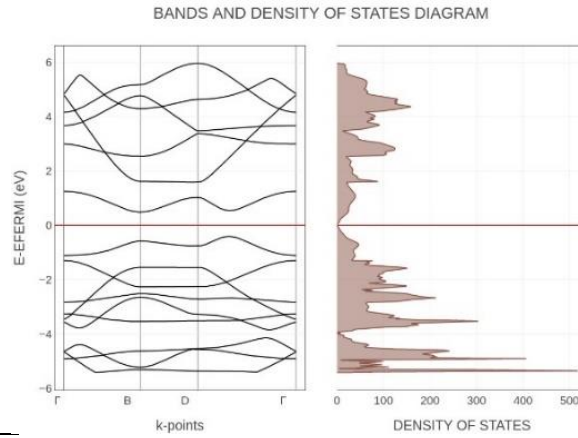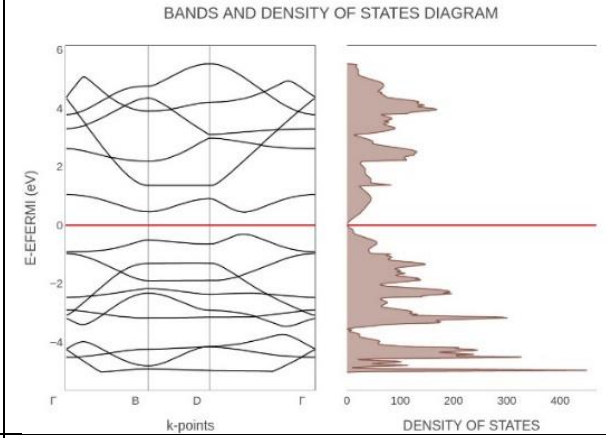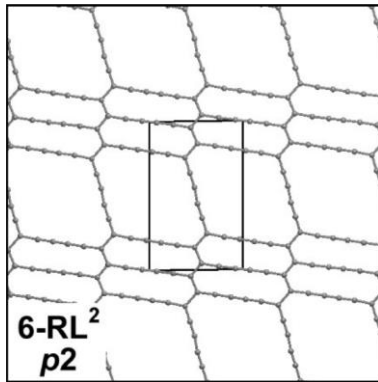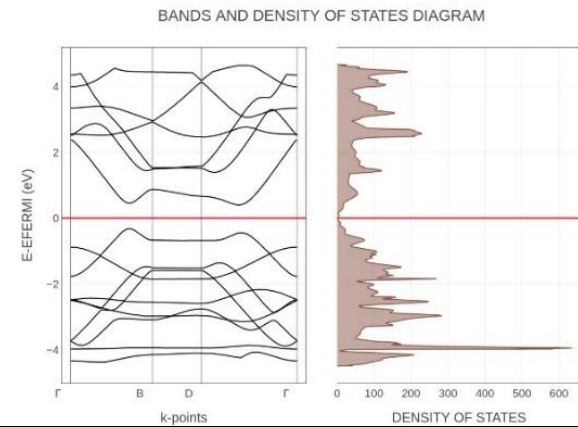

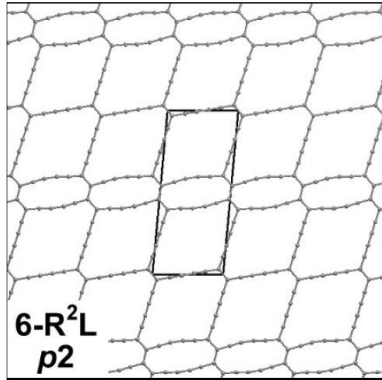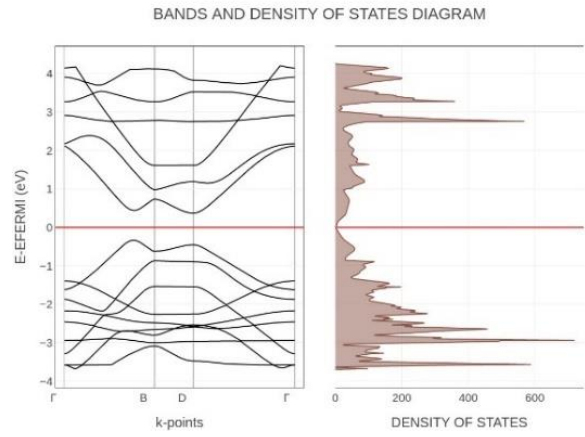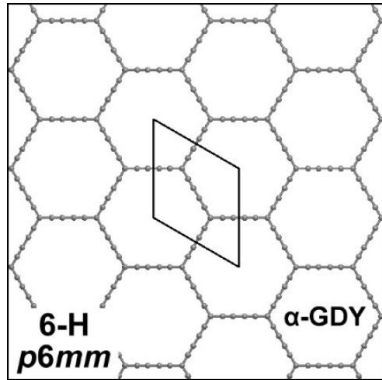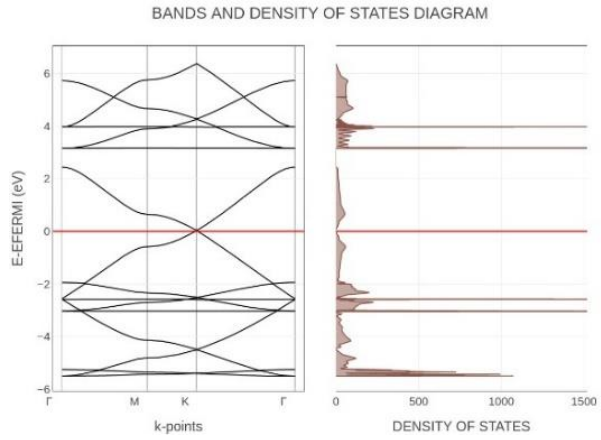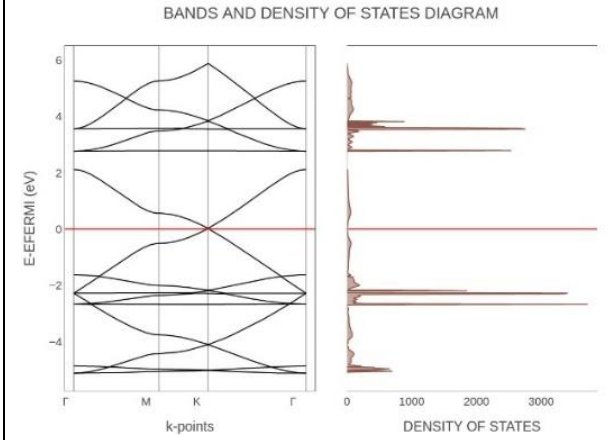

| # in Tab 1 | in red the new ones             | Rel Energy kcal/mol | Area (Graphene 5.26Å <sup>2</sup> ) | density atomi/angs <sup>2</sup> graphene 0.380 | SPGR   | Plane group | C(sp <sup>2</sup> )m X(sp)n | ratio sp/sp <sup>2</sup> | Z  | Pearson Symbol | # of C sp <sup>2</sup> in the primitive cell | RINGS in the primitive cell         | Other names        | JETP 2015 (ref. 16) JPCC 2019 grazynes (ref. 56) | npj Comp Mat 2018 (ref. 17) | Phys. Status Solidi RRL 2020 (ref. 18) | J Chem Phys 1987 (ref.15)                     |
|------------|---------------------------------|---------------------|-------------------------------------|------------------------------------------------|--------|-------------|-----------------------------|--------------------------|----|----------------|----------------------------------------------|-------------------------------------|--------------------|--------------------------------------------------|-----------------------------|----------------------------------------|-----------------------------------------------|
| 1          | 6-h <sup>3</sup> L              | 14,15               | 34,5                                | 0,348                                          | Pmmm   | p2mm        | C X2                        | 0,5                      | 4  | oP12           | 8                                            | [6] <sub>3</sub> [14]               |                    | [3],[2]-grazyne = 4-h <sup>3</sup> L             |                             |                                        |                                               |
| 2          | 6-h <sup>2</sup> L              | 16,81               | 58,2                                | 0,344                                          | Cmmm   | c2mm        | C2 X3                       | 0,66                     | 4  | oS20           | 6                                            | [6] <sub>2</sub> [14]               |                    | [2],[2]-grazyne = 4-h <sup>2</sup> L             |                             |                                        |                                               |
| 3          | 6-h <sup>2</sup> L <sup>2</sup> | 20,55               | 48,6                                | 0,329                                          | Pmma   | p2mg        | C X                         | 1                        | 8  | oP16           | 8                                            | [6] <sub>2</sub> [14] <sub>2</sub>  |                    |                                                  |                             |                                        |                                               |
| 4          | 6-hL                            | 20,59               | 24,3                                | 0,330                                          | Pmmm   | p2mm        | C X                         | 1                        | 4  | oP8            | 4                                            | [6][14]                             |                    | [1],[2]-grazyne = 4-hL                           |                             |                                        |                                               |
| 5          | 6-hT <sup>2</sup>               | 21,13               | 77,1                                | 0,233                                          | P6/mmm | p6mm        | C2 X                        | 2                        | 6  | hP18           | 6                                            | [6][18] <sub>2</sub>                | γ-GDY graphdyne    | γ1-graphyne-2                                    | 6-hT <sup>2</sup>           | 191-E6Y12-1                            | 6,6,6- = 4-hT <sup>2</sup><br>6,6,6-GDY       |
| 6          | 6-hRL <sup>2</sup>              | 22,65               | 191,9                               | 0,250                                          | Cmmm   | c2mm        | C2 X                        | 2                        | 16 | oS48           | 8                                            | [6][14] <sub>2</sub> [22]           |                    |                                                  |                             |                                        |                                               |
| 7          | 6-hT <sup>2</sup> R             | 22,69               | 131,1                               | 0,214                                          | Pmmm   | p2mm        | C5 X2                       | 2,5                      | 4  | oP28           | 8                                            | [6][18] <sub>2</sub> [22]           |                    | β2-γ2-graphyne = 4-hT <sup>2</sup> R             | 6-hT <sup>2</sup> R         | 47-E8Y20-0                             | 6,6,12- = 4-hT <sup>2</sup> R<br>6,6,18-GDY   |
| 8          | 6-hL <sup>2</sup>               | 23,11               | 87,3                                | 0,321                                          | Cmmm   | c2mm        | C4 X3                       | 1,33                     | 4  | oS28           | 6                                            | [6][14] <sub>2</sub>                |                    |                                                  | >25Å                        |                                        |                                               |
| 9          | 6-hL <sup>3</sup>               | 24,06               | 63,1                                | 0,317                                          | Pmmm   | p2mm        | C3 X2                       | 1,5                      | 4  | oP20           | 8                                            | [6][14] <sub>3</sub>                |                    |                                                  |                             |                                        |                                               |
| 10         | 6-hR <sup>3</sup>               | 24,07               | 166,5                               | 0,192                                          | P6/mmm | p6mm        | C3 X                        | 3                        | 8  | hP32           | 8                                            | [6][22] <sub>3</sub>                |                    |                                                  | 6-hR <sup>3</sup>           | 191-E12Y12-1                           |                                               |
| 11         | 6-RL <sup>2</sup>               | 24,73               | 87,2                                | 0,252                                          | P2/m   | p2          | C8 X3                       | 2,66                     | 2  | mP22           | 6                                            | [14] <sub>2</sub> [22]              |                    |                                                  |                             |                                        |                                               |
| 12         | 6-RL                            | 24,73               | 72,7                                | 0,220                                          | P2/m   | p2          | C3 X                        | 3                        | 4  | mP16           | 4                                            | [14][22]                            |                    |                                                  |                             |                                        |                                               |
| 13         | 6-R <sup>2</sup> L              | 25,03               | 127,2                               | 0,204                                          | P2/m   | p2          | C10 X3                      | 3,33                     | 2  | mP26           | 6                                            | [14][22] <sub>2</sub>               |                    |                                                  |                             |                                        |                                               |
| 14         | 6-HT <sup>2</sup> L             | 25,07               | 202,4                               | 0,178                                          | Pmmm   | p2mm        | C7 X2                       | 3,5                      | 4  | oP36           | 8                                            | [14][18] <sub>2</sub> [30]          | δ-GDY              | β1-γ2-graphyne = 4-HT <sup>2</sup> L             | [4-HT <sup>2</sup> L]       |                                        |                                               |
| 15         | 6-HT <sup>2</sup>               | 25,4                | 184,6                               | 0,163                                          | P6/mmm | p6mm        | C4 X                        | 4                        | 6  | hP30           | 6                                            | [18] <sub>2</sub> [30]              | β-GDY              | β1-graphyne-2                                    | 6-HT <sup>2</sup>           | 191-E6Y24-1                            | 12,12,12- = 4-HT <sup>2</sup><br>18,18,18-GDY |
| 16         | 6-HL <sup>3</sup>               | 25,41               | 165,6                               | 0,193                                          | P6/mmm | p6mm        | C3 X                        | 3                        | 8  | hP32           | 8                                            | [14] <sub>3</sub> [30]              |                    |                                                  | [4-HL <sup>3</sup> ]        | 191-E8Y24-1                            |                                               |
| 17         | 6-R                             | 25,48               | 109,4                               | 0,183                                          | Cmmm   | c2mm        | C4 X                        | 4                        | 4  | oS20           | 2                                            | [22]                                | carbon ene-yne CEY | β2-graphyne-2                                    | 6-R                         | 65-E4Y16-0                             | 14,14,14- = 4-R<br>22,22,22-GDY               |
| 18         | 6-HR <sup>2</sup> L             | 25,85               | 474,9                               | 0,168                                          | Cmmm   | c2mm        | C4 X                        | 4                        | 16 | oS80           | 8                                            | [14][22] <sub>2</sub> [30]          |                    |                                                  | >25Å                        |                                        |                                               |
| 19         | 6-HR <sup>3</sup>               | 26,11               | 276,1                               | 0,159                                          | Pmmm   | p2mm        | C9 X2                       | 4,5                      | 4  | oP44           | 8                                            | [22] <sub>3</sub> [30]              |                    |                                                  | >25Å                        |                                        |                                               |
| 20         | 6-L                             | 26,18               | 38,9                                | 0,309                                          | Cmmm   | c2mm        | C2 X                        | 2                        | 4  | oS12           | 2                                            | [14]                                |                    | γ2-graphyne-2                                    |                             | 65-E4Y8-0<br>γ2-graphdyne              |                                               |
| 21         | 6-HR <sup>2</sup>               | 26,3                | 442,5                               | 0,154                                          | Cmmm   | c2mm        | C14 X3                      | 4,66                     | 4  | oS68           | 6                                            | [22] <sub>2</sub> [30]              |                    | α-β2-graphyne Fig 4b = 4-HR <sup>2</sup>         | >25Å                        |                                        |                                               |
| 22         | 6-HR                            | 26,63               | 166,7                               | 0,144                                          | Pmmm   | p2mm        | C5 X                        | 5                        | 4  | oP24           | 4                                            | [22][30]                            |                    | α-β2-graphyne Fig 4a = 4-HR                      | 6-HR                        | 47-E4Y20-0                             | 14,14,18- = 4-HR<br>22,22,30-GDY              |
| 23         | 6-H <sup>2</sup> R <sup>2</sup> | 26,63               | 333,5                               | 0,144                                          | Pmma   | p2mg        | C5 X                        | 5                        | 8  | oP48           | 8                                            | [22] <sub>2</sub> [30] <sub>2</sub> |                    |                                                  | >25Å                        |                                        |                                               |
| 24         | 6-H <sup>2</sup> R              | 26,92               | 558,2                               | 0,136                                          | Cmmm   | c2mm        | C16 X3                      | 5,33                     | 4  | oS76           | 6                                            | [22][30] <sub>2</sub>               |                    |                                                  | >25Å                        |                                        |                                               |
| 25         | 6-H <sup>3</sup> R              | 27,05               | 391,5                               | 0,133                                          | Pmmm   | p2mm        | C11 X2                      | 5,5                      | 4  | oP52           | 8                                            | [22][30] <sub>3</sub>               |                    |                                                  | >25Å                        |                                        |                                               |
| 26         | 6-H                             | 27,39               | 112,5                               | 0,124                                          | P6/mmm | p6mm        | C6 X                        | 6                        | 2  | hP14           | 2                                            | [30]                                | α-GDY              | α-graphyne-2                                     | 6-H                         | 191-E2Y22-0                            | 18,18,18- = 4-H<br>30,30,30-GDY               |

**Table S2:** Crystallographic informations for all the 26 2D GDY-based crystals investigated in the work
